# Supplementary material for: Universal Features of Post-Transcriptional Gene Regulation Are Critical for Plasmodium Zygote Development
Source: PLoS Pathog. 2010 Feb 12;6(2):e1000767. doi: 10.1371/journal.ppat.1000767 (PMC2820534; doi:10.1371/journal.ppat.1000767)
Supplement: Table S2 — Microarray analysis of genes differentially regulated in the CITH-KO (0.05 MB XLS) [file ppat.1000767.s018.xls]

## Sheet: cith
Table S2
Microarray analysis of genes differentially regulated in the CITH-KO
Pb gene		gene ID Plasmodium berghei (data source: www.plasmodb.org)
WT vs CITH-KO		log2 ratio of wildtype compared to CITH-KO using purified gametocytes
RT-PCR		cross indicates enrichment of transcript in CITH::GFP immunoprecipitation eluate
Pf ortholog		Plasmodium falciparum ortholog of Plasmodium berghei gene (data source: www.plasmodb.org)
TM		number of transmembrane domains in the Plasmodium berghei protein (data source: www.plasmodb.org)
SP		presence of a signal peptide in the Plasmodium berghei protein is inidcated by a cross (data source: www.plasmodb.org)
orange shading		downregulated in the CITH-KO mutant compared to wildtype gametocytes
blue shading		downregulated in CITH-KO mutant compared to wildtype parasite gametocytes
Pb gene	WT vs CITH	TM	SP	Pf ortholog	Product Description
PB000836.00.0	3.79		x	PFI0995w	conserved Plasmodium protein, unknown function
PB000266.01.0	3.51	2	x	PF10_0303	25 kDa ookinete surface antigen precursor (pfs25)
PB000296.02.0	3.5			MAL13P1.312	conserved Plasmodium protein, unknown function
PB000020.03.0	3.27		x	PF08_0136b	von willebrand factor a-domain-related protein, putative
PB000814.03.0	3.18	1		PFI0205w	conserved Plasmodium protein, unknown function
PB000314.02.0	3.17			PFI0460w	conserved Plasmodium protein, unknown function
PB001203.02.0	3.11		x	MAL7P1.74	conserved Plasmodium protein, unknown function
PB000432.00.0	3.11			PFE0220w	conserved Plasmodium protein, unknown function
PB300567.00.0	2.95			PFL2420w	conserved Plasmodium protein, unknown function
PB000245.02.0	2.91			PFL2320w	conserved Plasmodium protein, unknown function
PB001250.02.0	2.84			PFL0385c	blood stage antigen 41-3 precursor
PB300830.00.0	2.83		x	PFE0945c	psop13
PB000566.02.0	2.74			MAL13P1.84	protein kinase, putative
PB000673.02.0	2.72			PF14_0227	calcium/calmodulin-dependent protein kinase, putative
PB000090.02.0	2.67			PFF0735w	conserved Plasmodium protein, unknown function
PB300774.00.0	2.66			PFI1455c	conserved Plasmodium protein, unknown function
PB001084.00.0	2.61			PF14_0491	lap5
PB000408.03.0	2.55			PFB0177c	conserved Plasmodium protein, unknown function
PB000768.03.0	2.54			PF14_0717	conserved Plasmodium protein, unknown function
PB000214.02.0	2.54			PFI0705w	conserved Plasmodium protein, unknown function
PB103795.00.0	2.45	1	x		Pb-fam-3 protein
PB000201.02.0	2.43	9		PFE0825w	metabolite/drug transporter, putative
PB000907.00.0	2.38			PFI0775w	glycolipid transfer protein, putative
PB000829.00.0	2.36			PFI1005w	ADP-ribosylation factor-like protein
PB000865.00.0	2.36	1	x	PF10_0302	28 kDa ookinete surface protein
PB001532.02.0	2.34			PF07_0029	heat shock protein 86
PB000388.00.0	2.33			PFL1765c	conserved Plasmodium protein, unknown function
PB000530.01.0	2.33	3		PFE0725c	conserved Plasmodium membrane protein, unknown function
PB000621.01.0	2.29			PF11_0045	CPW-WPC family protein
PB001166.02.0	2.29			PFF1035w	Pfs77 protein
PB000981.00.0	2.28			PF11_0160	conserved Plasmodium protein, unknown function
PB000634.00.0	2.25			PF14_0521	conserved Plasmodium protein, unknown function
PB000648.02.0	2.25			PFL1460c	conserved Plasmodium protein, unknown function
PB000876.00.0	2.23			MAL8P1.78	small heat shock protein, putative
PB000176.03.0	2.2	1	x	PFD0910w	conserved Plasmodium protein, unknown function
PB000866.03.0	2.18			PF08_0073	conserved Plasmodium protein, unknown function
PB300957.00.0	2.14			PF14_0628	conserved hypothetical protein
PB300940.00.0	2.14			PFL1165w	conserved Plasmodium protein, unknown function
PB000070.00.0	2.13			PFC0895w	CPW-WPC family protein
PB000874.00.0	2.11			MAL8P1.76	meiotic recombination protein dmc1-like protein
PB000504.02.0	2.06		x	PF14_0532	LCCL domain-containing protein CCP2
PB102048.00.0	2.06			PF14_0544	hypothetical protein
PB000653.03.0	2.04			PF13_0220	conserved Plasmodium protein, unknown function
PB000915.01.0	2.03	1	x	PFE0550w	conserved Plasmodium protein, unknown function
PB001530.02.0	2.02			MAL13P1.195	CPW-WPC family protein
PB000446.02.0	2.01	6		PFF1215w	sphingomyelin synthase, putative
PB000851.02.0	2			PFA0490w	conserved Plasmodium protein, unknown function
PB000461.01.0	1.99			PF11_0431	membrane skeletal protein, putative
PB101372.00.0	1.98				hypothetical protein
PB000717.03.0	1.96				hypothetical protein
PB001125.00.0	1.95			PF08_0033	membrane skeletal protein IMC1-related
PB000437.01.0	1.95			PF14_0625	Aspartyl protease, putative
PB102509.00.0	1.92	2			hypothetical protein
PB301316.00.0	1.88			PF07_0031	heat shock protein 86 family protein
PB000251.03.0	1.87			PFB0690w	conserved Plasmodium protein, unknown function
PB101678.00.0	1.87				hypothetical protein
PB001275.02.0	1.86	1	x	PFL0705c	adrenodoxin-type ferredoxin, putative
PB000242.01.0	1.85				hypothetical protein
PB108044.00.0	1.84				hypothetical protein
PB104209.00.0	1.84	2	x		conserved hypothetical protein
PB000594.00.0	1.83			PF14_0544	conserved Plasmodium protein, unknown function
PB300241.00.0	1.8			PFC0910w	conserved Plasmodium protein, unknown function
PB000346.00.0	1.79			PFC0176c	conserved Plasmodium protein, unknown function
PB000104.00.0	1.79	1	x	PFF1465w	conserved Plasmodium protein, unknown function
PB300689.00.0	1.78				hypothetical protein
PB000314.00.0	1.77			PFL1030w	membrane skeletal protein, putative
PB000230.01.0	1.77			PFL1090w	glideosome-associated protein 45
PB403516.00.0	1.77			PFE0530w	conserved Plasmodium protein, unknown function
PB000278.01.0	1.76		x	PF11_0372	conserved Plasmodium protein, unknown function
PB000084.01.0	1.75	3		PF08_0097	conserved Plasmodium membrane protein, unknown function
PB000682.02.0	1.74			PF13_0050	HORMA domain protein, putative
PB300813.00.0	1.74			PFC0185w	membrane skeletal protein IMC1-related
PB000997.02.0	1.74			PFE1440c	conserved Plasmodium protein, unknown function
PB101358.00.0	1.74	2			hypothetical protein
PB000831.01.0	1.73			PFC0350c	TCP-1/cpn60 chaperonin family
PB000671.00.0	1.7			MAL7P1.87	conserved Plasmodium protein, unknown function
PB000500.01.0	1.7				hypothetical protein
PB001036.00.0	1.7			PFE1540w	CPW-WPC family protein
PB300803.00.0	1.7	2		PF14_0682	conserved Plasmodium membrane protein, unknown function
PB000034.01.0	1.69			PF11_0325	conserved Plasmodium protein, unknown function
PB300170.00.0	1.69			PFE0770w	conserved Plasmodium protein, unknown function
PB001197.02.0	1.69	2		MAL13P1.129	conserved Plasmodium protein, unknown function
PB000166.03.0	1.68				hypothetical protein
PB300967.00.0	1.68			PFF0565c	conserved Plasmodium protein, unknown function
PB000322.00.0	1.66			PF14_0121	conserved Plasmodium protein, unknown function
PB000195.02.0	1.66			PFE0480c	conserved Plasmodium protein, unknown function
PB000209.00.0	1.65			PFE0730c	ribose 5-phosphate epimerase, putative
PB000821.00.0	1.62			PFL2190c	kinesin, putative
PB001102.01.0	1.62				hypothetical protein
PB000282.00.0	1.61			PF13_0123	conserved Plasmodium protein, unknown function
PB000633.00.0	1.6			PF14_0522	conserved Plasmodium protein, unknown function
PB000515.01.0	1.6			PF08_0100	ruvB-like DNA helicase, putative
PB000955.00.0	1.58			PF14_0157	conserved Plasmodium protein, unknown function
PB001148.02.0	1.57			PF08_0040	clp1-related protein, putative
PB001006.01.0	1.56	5		PFB0845w	conserved Plasmodium membrane protein, unknown function
PB000676.02.0	1.54			PFF1455c	CPW-WPC family protein
PB105751.00.0	1.53				conserved hypothetical protein
PB000126.00.0	1.53	3		PFF0175c	conserved Plasmodium protein, unknown function
PB001095.03.0	1.52			PFB0730w	dead/deah box helicase, putative
PB000572.01.0	1.51			PF11_0442	transcription factor with AP2 domain(s)
PB001074.02.0	1.51			PF13_0289	protease, caspase family
PB001658.02.0	1.51			PF14_0143	Atypical protein kinase, ABC-1 family, putative
PB000503.02.0	1.48	2		PFI0575c	conserved Plasmodium protein, unknown function
PB301514.00.0	1.47		x		hypothetical protein
PB000879.01.0	1.47			PF10_0153	hsp60
PB001162.01.0	1.45			PFB0400w	transmission-blocking target antigen s230 paralog
PB000035.03.0	1.45			PFL0080c	serine/threonine-protein kinase, Pfnek-3
PB000955.03.0	1.44		x	PFI0185w	conserved Plasmodium protein, unknown function
PB000249.03.0	1.44			PF13_0226	conserved Plasmodium protein, unknown function
PB000067.03.0	1.43			PF07_0119	conserved Plasmodium protein, unknown function
PB000638.02.0	1.42			PF14_0020	choline kinase
PB000011.02.0	1.41	1		PFI1095w	conserved Plasmodium protein, unknown function
PB000824.02.0	1.4		x	PF13_0093	conserved Plasmodium protein, unknown function
PB000753.02.0	1.4				hypothetical protein
PB000644.01.0	1.38		x		hypothetical protein
PB000662.02.0	1.38			MAL8P1.29	conserved Plasmodium protein, unknown function
PB300563.00.0	1.38			PF07_0113	conserved Plasmodium protein, unknown function
PB000463.03.0	1.38			PF14_0309	protein-L-isoaspartate O-methyltransferase beta-aspartate methyltransferase, putative
PB405932.00.0	1.37				hypothetical protein
PB300652.00.0	1.36			MAL13P1.316	conserved Plasmodium protein, unknown function
PB300696.00.0	1.36			MAL13P1.342	conserved Plasmodium protein, unknown function
PB001059.00.0	1.35			PF11_0087	Rad51 homolog, putative
PB001286.02.0	1.35			PF14_0725	tubulin, putative
PB001090.00.0	1.34		x	PF07_0094	conserved Plasmodium protein, unknown function
PB000527.03.0	1.33			MAL13P1.45	U4/U6 small nuclear ribonuclear protein, putative
PB001277.02.0	1.33			MAL13P1.88	conserved Plasmodium protein, unknown function
PB000028.02.0	1.32			MAL8P1.137	conserved Plasmodium protein, unknown function
PB300823.00.0	1.32			PF07_0029	heat shock protein 86, putative
PB000333.02.0	1.31	2		PFF0370w	para-hydroxybenzoate--polyprenyltransferase (4- hydroxybenzoate octaprenyltransferase), putative
PB001039.00.0	1.29			PF14_0360	eIF2A
PB001293.00.0	1.29	1	x	PFL1675c	CPW-WPC family protein
PB001050.02.0	1.28			PF14_0124	actin II
PB000401.00.0	1.28	1	x	PFF0495w	mitochondrial ribosomal protein L19 precursor, putative
PB001160.01.0	1.27			PFF1045w	conserved Plasmodium protein, unknown function
PB000164.03.0	1.27			PFL0650c	conserved Plasmodium protein, unknown function
PB105866.00.0	1.26		x		conserved hypothetical protein
PB001233.02.0	1.26			PF10_0329	plasmepsin VII
PB000346.03.0	1.26			PFL1425w	t-complex protein 1, gamma subunit, putative
PB000066.02.0	1.24			PF13_0349	nucleoside diphosphate kinase b, putative
PB000812.02.0	1.23			MAL13P1.233	nucleic acid binding protein, putative
PB000992.00.0	1.23			PF07_0125	tRNA pseudouridine synthase D, putative
PB000738.00.0	1.23			PFF1135w	transcription or splicing factor-like protein, putative
PB000021.01.0	1.23	1	x	PFB0890c	pseudouridine synthetase, putative
PB000157.01.0	1.22			MAL13P1.102	conserved Plasmodium protein, unknown function
PB000892.00.0	1.22	1	x	PFD0210c	pbs36 homologue
PB000802.03.0	1.21		x	MAL7P1.14	conserved Plasmodium protein, unknown function
PB000189.02.0	1.21			PF11_0307	phosphatidylinositol-4-phosphate 5-kinase, putative
PB000817.01.0	1.2			PF07_0104	kinesin-like protein, putative
PB001452.02.0	1.2			PF13_0156	proteasome subunit beta type 7 precursor, putative
PB000864.03.0	1.2	1	x	PFC0495w	plasmepsin VI
PB000606.01.0	1.19			MAL8P1.108	protein phosphatase, putative
PB001624.02.0	1.18	6		PFI1305w	conserved Plasmodium membrane protein, unknown function
PB000230.03.0	1.16		x	PFI1225w	conserved Plasmodium protein, unknown function
PB000922.00.0	1.16			PFI0885w	cytochrome b5-like Heme/Steroid binding domain containing protein
PB000051.02.0	1.15			PF13_0103	conserved Plasmodium protein, unknown function
PB000942.03.0	1.14			PF13_0228	40S ribosomal protein S6, putative
PB000411.00.0	1.14				hypothetical protein, conserved
PB301233.00.0	1.13			PF10_0107	conserved protein, unknown function
PB000004.01.0	1.13			PF14_0693	conserved Plasmodium protein, unknown function
PB000733.01.0	1.11			PFL0740c	10 kd chaperonin, putative
PB001237.00.0	1.11			PFD0545w	conserved Plasmodium protein, unknown function
PB001646.02.0	1.1			PFL1010c	conserved Plasmodium protein, unknown function
PB000555.02.0	1.1			PF13_0109	N2,N2-dimethylguanosine tRNA methyltransferase, putative
PB000924.03.0	1.1			PF10_0115	QF122 antigen
PB000170.03.0	1.09			PF14_0326	dynein-related AAA-type ATPase
PB000685.03.0	1.09			PF14_0683	conserved Plasmodium protein, unknown function
PB001099.00.0	1.09			PF14_0166	lysine -- tRNA ligase, putative
PB000609.03.0	1.08			PF11_0058	rna polymerase subunit, putative
PB001334.02.0	1.07		x	PF14_0040	Secreted ookinete adhesive protein
PB000878.02.0	1.07			PF10_0063	DNA/RNA-binding protein, putative
PB000436.01.0	1.05			PF14_0624	conserved Plasmodium protein, unknown function
PB000378.01.0	1.05	1		PFL2205w	conserved Plasmodium protein, unknown function
PB001160.00.0	1.04			PFI1155w	conserved Plasmodium protein, unknown function
PB000872.00.0	1.03			PF08_0063	ClpB protein, putative
PB000507.03.0	1.03			PF08_0118	conserved Plasmodium protein, unknown function
PB001094.01.0	1.01			PFL0760w	conserved Plasmodium protein, unknown function
PB000270.03.0	1.01				hypothetical protein
PB000018.03.0	1.01			PF14_0272	CPW-WPC family protein
PB000272.02.0	1			PF14_0222	Ankyrin, putative
PB104017.00.0	0.99		x		hypothetical protein
PB000339.03.0	0.99			PF14_0278	ATP-dependent DNA helicase, putative
PB001431.02.0	0.99			PF08_0084	RNA-binding protein (U1 snRNP-like), putative
PB000691.03.0	0.99			MAL13P1.290	high mobility group protein 4, putative
PB401455.00.0	-0.97				hypothetical protein
PB300220.00.0	-0.97	1		PF14_0252	conserved Plasmodium protein, unknown function
PB000707.03.0	-1			PF10_0180	conserved Plasmodium protein, unknown function
PB103145.00.0	-1				hypothetical protein
PB000853.00.0	-1	1		PF14_0091	conserved hypothetical protein
PB000317.00.0	-1	1			hypothetical protein
PB103492.00.0	-1.03		x		hypothetical protein
PB000996.03.0	-1.03			MAL13P1.323	conserved Plasmodium protein, unknown function
PB000906.01.0	-1.03				conserved hypothetical protein
PB000072.00.0	-1.03			PFD0385w	conserved Plasmodium protein, unknown function
PB000328.02.0	-1.03			PFL2090c	P. falciparum homologue of yeast snf7
PB000408.01.0	-1.06			PF10_0292	conserved Plasmodium protein, unknown function
PB000237.02.0	-1.06			PFC1045c	conserved Plasmodium protein, unknown function
PB000262.03.0	-1.06				hypothetical protein
PB000393.01.0	-1.06			PF11_0312	60S ribosomal protein L38e, putative
PB000106.01.0	-1.06	12		PFF0690c	organic anion transporter
PB000491.00.0	-1.09		x	PFE0205w	ATP-dependent helicase, putative
PB000779.00.0	-1.09			PF14_0102	rhoptry-associated protein 1, RAP1
PB103818.00.0	-1.09	2			conserved hypothetical protein
PB100738.00.0	-1.09	2			hypothetical protein
PB300216.00.0	-1.09	3			hypothetical protein
PB000485.03.0	-1.09				hypothetical protein
PB000459.01.0	-1.12			PFC0755c	protein kinase, predicted
PB101458.00.0	-1.12	1	x		conserved hypothetical protein
PB106943.00.0	-1.15				protein kinase, putative
PB000366.02.0	-1.15			PFE0175c	unconventional myosin pfm-b
PB001322.02.0	-1.18			PF14_0578	conserved Plasmodium protein, unknown function
PB001185.00.0	-1.18			PFC0190c	EH (Eps15 homology) protein
PB000255.01.0	-1.18				hypothetical protein
PB300665.00.0	-1.18	2	x	PFI0880c	glideosome-associated protein 50
PB000015.03.0	-1.18	2		PF14_0607	conserved Plasmodium membrane protein, unknown function
PB000538.00.0	-1.22			MAL13P1.405	erythrocyte membrane protein pfemp3, putative
PB001071.02.0	-1.22	1		PFD0225w	conserved Plasmodium membrane protein, unknown function
PB300227.00.0	-1.25				hypothetical protein
PB000264.00.0	-1.25		x	PF14_0044	conserved Plasmodium protein, unknown function
PB000619.02.0	-1.25	1		PFD0720w	conserved ARM repeats protein, unknown function
PB000379.02.0	-1.32	1		PF14_0495	conserved Plasmodium protein, unknown function
PB000963.01.0	-1.47		x	PFD0240c	pfs45-48 related protein, putative|6-cysteine protein family
PB000254.00.0	-1.51			PFB0765w	conserved Plasmodium protein, unknown function
PB108842.00.0	-1.51				hypothetical protein
PB000327.03.0	-1.51			PFL2520w	reticulocyte-binding protein 3 homologue
PB000508.03.0	-1.56			PF08_0119	conserved Plasmodium protein, unknown function
PB000163.02.0	-1.64			PF10_0407	dihydrolipoamide S-acetyltransferase
PB000282.01.0	-1.69	1		PFA0125c	erythrocyte binding antigen-181
PB001080.02.0	-1.79	1	x	PFL0870w	Thrombospondin-related apical membrane protein
PB000821.01.0	-1.94	1		PF11_0344	apical membrane antigen 1, AMA1
PB000273.03.0	-2.06	9		PFB0435c	transporter, putative
PB000232.03.0	-2.12			PF08_0035	conserved Plasmodium protein, unknown function
PB001140.00.0	-2.64			PFB0570w	SPATR protein, putative
